# Supplementary material for: The genetic basis and experimental evolution of inbreeding depression in Caenorhabditis elegans
Source: PubMed Central journal article supplement — Heredity (Edinb). 2013 Oct 16;112(3):248–54. doi: 10.1038/hdy.2013.100 (PMC3931175; doi:10.1038/hdy.2013.100), 2013-10-16
Supplement: hdy2013100x1.pdf [file hdy2013100x1.pdf]

**Supplementary Information** for “The genetic basis and experimental evolution of inbreeding depression in *Caenorhabditis elegans*” by Ivo M. Chelo, Sara Carvalho, Miguel Roque, Stephen Proulx and Henrique Teotónio

**Supplementary Information** is composed of one figure (Figure S1) and three tables (Tables S1-S3). This file contains Figure S1, and Table titles.

SUPPLEMENTARY FIGURE 1

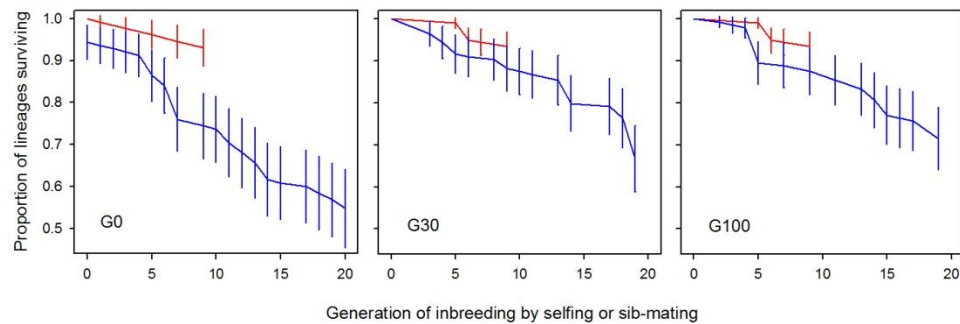

**Figure S1. Survival rates with inbreeding.** In each panel, it is shown the proportion of lineages that survive multiple generations of inbreeding in the androdioecious (red) or dioecious (blue) populations. See **Figure S1** for the same data plotted by the expected inbreeding coefficient at each generation of inbreeding. Error bars show 2xSD.

**Table S1. Samples sizes for the inbreeding assays.**

**Table S2. SNP info and sample sizes in inbred lines.**

**Table S3. SNP genotype sample sizes in experimental evolution populations.**
